# Supplementary material
Source: PubMed Central journal article supplement (PMC3310495)
Supplement: supp_mcs013_mcs013supp.pdf [file supp_mcs013_mcs013supp.pdf]

## SUPPLEMENTARY DATA

TABLE S1. Localities of the populations from which samples were used as either Dutch or European ‘context samples’ in this study.

### *Asplenium scolopendrium*

| Sample no.      | Country         | Province                     | Locality                       |
|-----------------|-----------------|------------------------------|--------------------------------|
| The Netherlands |                 |                              |                                |
| 735             | The Netherlands | Flevoland                    | Voorsterbos                    |
| 736             | “               | “                            | “                              |
| 1041            | The Netherlands | Flevoland                    | Jagersveld, Lelystad           |
| 127             | The Netherlands | Friesland                    | Leeuwarden                     |
| 1109            | The Netherlands | Groningen                    | Groningen                      |
| 1115            | The Netherlands | Groningen                    | Musselkanaal                   |
| 1394            | The Netherlands | Overijssel                   | Oldenzaal                      |
| 116             | The Netherlands | Noord-Holland                | Alkmaar                        |
| 120             | The Netherlands | Noord-Holland                | Den Helder                     |
| 121             | The Netherlands | Noord-Holland                | Park ‘De Wiedijk’, Amsterdam   |
| 122             | “               | “                            | “                              |
| 1051            | The Netherlands | Noord-Holland                | Willem I Sluis, Amsterdam      |
| 1170            | The Netherlands | Utrecht                      | Soesterberg                    |
| 124             | The Netherlands | Utrecht                      | Kanaalweg, Utrecht             |
| 125             | The Netherlands | Utrecht                      | Amelisweerd, Utrecht           |
| 126             | The Netherlands | Utrecht                      | Zeist                          |
| 1063            | The Netherlands | Gelderland                   | Zutphen                        |
| 1046            | The Netherlands | Gelderland                   | Wageningen                     |
| 1107            | The Netherlands | Gelderland                   | Apeldoorn                      |
| 1066            | The Netherlands | Zuid-Holland                 | Brielle                        |
| 1068            | The Netherlands | Zuid-Holland                 | Oostvoorne                     |
| 1076            | The Netherlands | Zeeland                      | Middelburg                     |
| 167             | The Netherlands | Limburg                      | Schone Grub, Savelsbos         |
| 162             | The Netherlands | Limburg                      | Sint Pietersberg               |
| Europe          |                 |                              |                                |
| 1185            | Belgium         | Luxembourg                   | Han                            |
| 1327            | France          | France-Comté                 | Oberhaslach, Cascade de Nibeck |
| 131             | France          | Pyrénées-Orientales          | Montbolo                       |
| 133             | Germany         | Niedersaechsisches Berglands | Leinetal, Durringer Berg       |
| 149             | Germany         | Baden-Württemberg            | Beuron, Obere Donau            |
| 130             | Germany         | Nedersaksen                  | Springe, Kleiner Deister       |
| 134             | Germany         | Rheinland-Pfalz              | Bundenbach                     |
| 135             | “               | “                            | “                              |
| 136             | Germany         | Nedersaksen                  | Ith                            |
| 138             | Switzerland     | Bern                         | Meiringen                      |
| 140             | Switzerland     | Zürich                       | Ramsfluh                       |
| 197             | Austria         | Oberösterreich               | Swartzenthal                   |
| 145             | United Kingdom  | Cardiganshire, Wales         | Aberystwyth                    |
| 129             | United Kingdom  | Shropshire, England          | Grinshill                      |
| 147             | United Kingdom  | North Ayrshire, Scotland     | Isle of Arran                  |
| 990             | United Kingdom  | Kent, England                | Ightham Mote, Sevenoaks        |
| 1003            | United Kingdom  | West Sussex, England         | West Hoathly                   |
| 180             | Ukraine         | Transcarpathia               | Carpathian Biosphere Reserve   |
| 186             | Ukraine         | Kamianets-Podilski           | Podilski Tovtry National Park  |

*Asplenium trichomanes* subsp. *quadrivalens*

| Sample no.      | Country         | Province            | Locality                          |
|-----------------|-----------------|---------------------|-----------------------------------|
| The Netherlands |                 |                     |                                   |
| 399             | The Netherlands | Utrecht             | Utrecht                           |
| 390             | The Netherlands | Limburg             | Eckelrade                         |
| 387             | The Netherlands | Limburg             | Aldenhof, Maastricht              |
| 382             | The Netherlands | Limburg             | Academieplein, Maastricht         |
| 1053            | The Netherlands | Noord-Holland       | Amsterdam                         |
| 1060            | The Netherlands | Friesland           | Leeuwarden                        |
| 1061            | The Netherlands | Friesland           | Jelsum                            |
| 1081            | The Netherlands | Zeeland             | Middelburg                        |
| 1110            | The Netherlands | Groningen           | Stadskanaal                       |
| 1117            | The Netherlands | Drenthe             | Smilde                            |
| 1188            | The Netherlands | Gelderland          | Elburg                            |
| Europe          |                 |                     |                                   |
| 1182            | Belgium         | Luxembourg          | Bouillon                          |
| 1184            | Belgium         | Luxembourg          | Han                               |
| 395             | Luxembourg      | Diekirch            | Diekirch                          |
| 1118            | Luxembourg      | Echternach          | Consdorf                          |
| 422             | France          | Auvergne            | Royat                             |
| 427             | France          | Morvan              | Les Settons                       |
| 944             | France          | Pyrénées-Orientales | Montbolo                          |
| 1189            | France          | France-Compté       | Xonrupt-Longemer                  |
| 2642            | France          | Indre               | Aigurande                         |
| 437             | Portugal        | Sátão               | Duas Igrejas                      |
| 921             | Italy           | Veneto              | Venice                            |
| 928             | Italy           | Genua               | Chiavari                          |
| 937             | Hungary         | Fejér               | Meszes-Völgy, North of Csákberény |
| 417             | Ukraine         | Transcarpathia      | Carpathian Biosphere Reserve      |
| 403             | Ukraine         | Kamianets-Podilski  | Podilski Tovtry National Park     |
| 1450            | Slovenia        | Kobarid             | Staro Selo                        |
| 1451            | Austria         | Carinthia           | Eggen                             |
| 1452            | Austria         | Niederösterreich    | Gloggnitz                         |
| 938             | Germany         | Nordrhein-Westfalen | Borchen                           |
| 941             | Germany         | Nordrhein-Westfalen | Horn, Bad Meinberg                |
| 943             | Germany         | Nordrhein-Westfalen | Wuppertal – Steinbeck             |
| 770             | United Kingdom  | Bromley, England    | Bromney Common                    |
| 852             | United Kingdom  | Bromley, England    | Hayes                             |
| 927             | United Kingdom  | Cumbria, Scotland   | Kwin Pier, Bowness-on-Windermere  |
| 936             | United Kingdom  | Scotland            | Arhoe                             |
| 1449            | United Kingdom  | North Yorkshire     | Goathland                         |
| 1179            | Sweden          | Gotland             | Vaskinde                          |
| 1180            | Norway          | Buskerud            | Hole                              |

*Polystichum setiferum*

| Sample no.      | Country         | Province             | Locality                    |
|-----------------|-----------------|----------------------|-----------------------------|
| The Netherlands |                 |                      |                             |
| 354             | The Netherlands | Flevoland            | Bremerbergbos               |
| 759             | The Netherlands | Flevoland            | Waterloopbos                |
| 1209            | The Netherlands | Flevoland            | Abbertsbos                  |
| 957             | The Netherlands | Flevoland            | Swifterbant                 |
| 958             | “               | “                    | “                           |
| 959             | The Netherlands | Flevoland            | Voorsterbos, site 1         |
| 960             | The Netherlands | Flevoland            | Voorsterbos, site 2         |
| 961             | “               | “                    | “                           |
| 962             | “               | “                    | “                           |
| 963             | “               | “                    | “                           |
| 964             | The Netherlands | Flevoland            | Voorsterbos, site 3         |
| 965             | “               | “                    | “                           |
| 966             | “               | “                    | “                           |
| 967             | “               | “                    | “                           |
| 968             | The Netherlands | Flevoland            | Overijsselse Hout, Lelystad |
| 969             | “               | “                    | “                           |
| 970             | “               | “                    | “                           |
| 971             | “               | “                    | “                           |
| 1067            | The Netherlands | Zuid-Holland         | Brielle                     |
| 1080            | The Netherlands | Zeeland              | Middelburg                  |
| Europe          |                 |                      |                             |
| 897             | Belgium         | Hainaut              | Thuin                       |
| 898             | France          | Languedoc-Roussillon | Quillun                     |
| 899             | France          | Haute Savoie         | St-Andre-Val-de-Fier        |
| 900             | France          | Côtes-du-Nord        | Lamballe                    |
| 1191            | France          | France-Compté        | Forêt de la Bresse          |
| 902             | Switzerland     | Porrentruy           | Plainmont                   |
| 765             | United Kingdom  | Kent, England        | Ightham Mote, Sevenoaks     |
| 766             | United Kingdom  | East Sussex, England | Frant                       |
| 767             | United Kingdom  | West Sussex, England | West Hoathly                |
| 768             | United Kingdom  | West Sussex, England | Horsted Keynes              |
| 904             | United Kingdom  | South Essex          | Brentwood                   |
| 905             | United Kingdom  | West Inverness-shire | Loch Aline                  |

***Polystichum aculeatum***

| Sample no.      | Country         | Province             | Locality                          |
|-----------------|-----------------|----------------------|-----------------------------------|
| The Netherlands |                 |                      |                                   |
| 355             | The Netherlands | Limburg              | Sint Pietersberg                  |
| 356             | “               | “                    | “                                 |
| 357             | “               | “                    | “                                 |
| 365             | The Netherlands | Limburg              | Sjegkelder Grub, Savelsbos        |
| 366             | “               | “                    | “                                 |
| 367             | “               | “                    | “                                 |
| 372             | The Netherlands | Limburg              | Schone Grub, Savelsbos            |
| 373             | “               | “                    | “                                 |
| 374             | “               | “                    | “                                 |
| Europe          |                 |                      |                                   |
| 871             | Luxembourg      | Esch-sur-Alzette     | Tetangé                           |
| 1120            | Luxembourg      | Echternach           | Consdorf                          |
| 887             | Belgium         | Liège                | Pepinster                         |
| 888             | Belgium         | Namur                | Vresse                            |
| 889             | France          | Haute Garonne        | Bagnères-de-Luchon, Neste d'Oo    |
| 890             | “               | “                    | “                                 |
| 891             | France          | France-Compté        | Gerbépal                          |
| 892             | France          | Haute Garonne        | Bagnères-de-Luchon, Vallee du Lys |
| 1329            | France          | France-Compté        | Oberhaslach, Cascade de Nibeck    |
| 886             | Austria         | Vorarlberg           | Vadans                            |
| 761             | United Kingdom  | Kent, England        | Ightham Mote, Sevenoaks           |
| 762             | United Kingdom  | East Sussex, England | Frant                             |
| 763             | United Kingdom  | West Sussex, England | West Hoathly                      |
| 764             | United Kingdom  | West Sussex, England | Horsted Keynes                    |
| 882             | United Kingdom  | Argyllshire          | Puck's Glenn                      |
| 1669            | United Kingdom  | Oberösterreich       | Wolfgangsee                       |
| 1172            | Norway          | Hardanger            | Granvin                           |
| 1175            | Sweden          | Dalsland             | Gunnarsnäs                        |

TABLE S2. Pairwise genetic distances between Kuinderbos populations of (a) *A. scolopendrium*, (b) *A. trichomanes*, (c) *P. setiferum* and (d) *P. aculeatum*. Genetic distances were calculated both as pairwise  $G_{ST}$  (values below the shaded squares) and by the Sørensen Similarity Index (QS; values above the shaded squares).

| (a)   | Asco1 | Asco2 | Asco3 | Asco4 | Asco5 | Asco6 |
|-------|-------|-------|-------|-------|-------|-------|
| Aco1  |       | 0.417 | 0.604 | 0.375 | 0.500 | 0.350 |
| Asco2 | 0.163 |       | 0.658 | 0.550 | 0.611 | 0.471 |
| Asco3 | 0.095 | 0.031 |       | 0.475 | 0.649 | 0.375 |
| Asco4 | 0.133 | 0.013 | 0.017 |       | 0.500 | 0.593 |
| Asco5 | 0.159 | 0.061 | 0.024 | 0.018 |       | 0.483 |
| Asco6 | 0.369 | 0.082 | 0.147 | 0.112 | 0.088 |       |

| (b)   | Atri1 | Atri2 | Atri3 |
|-------|-------|-------|-------|
| Atri1 |       | 0.629 | 0.601 |
| Atri2 | 0.090 |       | 0.625 |
| Atri3 | 0.219 | 0.355 |       |

| (c)   | Pset1 | Pset2 | Pset3 | Pset4 | Pset5 | Pset6 |
|-------|-------|-------|-------|-------|-------|-------|
| Pset1 |       | 0.250 | 0.500 | 0.500 | 0.322 | 0.333 |
| Pset2 | 0.565 |       | 0.250 | 0.250 | 0.317 | 0.133 |
| Pset3 | 0.500 | 0.565 |       | 0.750 | 0.267 | 0.667 |
| Pset4 | 0.363 | 0.477 | 0.113 |       | 0.350 | 0.333 |
| Pset5 | 0.582 | 0.475 | 0.607 | 0.517 |       | 0.222 |
| Pset6 | 0.521 | 0.551 | 0.187 | 0.330 | 0.406 |       |

| (d)   | Pacu1 | Pacu2 | Pacu3 | Pacu4 | Pacu5 | Pacu6 |
|-------|-------|-------|-------|-------|-------|-------|
| Pacu1 |       | 0.588 | 0.500 | 0.556 | 0.561 | 0.561 |
| Pacu2 | 0.176 |       | 0.500 | 0.459 | 0.603 | 0.595 |
| Pacu3 | 0.352 | 0.284 |       | 0.542 | 0.447 | 0.488 |
| Pacu4 | 0.201 | 0.118 | 0.293 |       | 0.552 | 0.408 |
| Pacu5 | 0.211 | 0.158 | 0.263 | 0.162 |       | 0.862 |
| Pacu6 | 0.125 | 0.126 | 0.257 | 0.143 | 0.045 |       |
